# Supplementary material
Source: publisher figshare collection journal article supplement (https://karger.figshare.com/ndownloader/files/13151384)
Supplement: Supplementary file 1 [file 13151384]

**Suppl. Table 1.** Details of the analyzed populations and their respective collection sites.

| **Sample number** | **Laboratory registration** | **Species** | **Collect point** | **Coordinates** | | **Hydrographic basin** |
| --- | --- | --- | --- | --- | --- | --- |
| 2 | 1702 | *H.* aff. *ancistroides* | São Miguel Arcanjo | 23°54’14.30”S | 47°55’46.75”W | Paranapanema River |
| 3 | 1705 | *H.* aff. *ancistroides* | São Miguel Arcanjo | 23°54’14.30”S | 47°55’46.75”W | Paranapanema River |
| 4 | 1726 | *H. ancistroides* | Araras | 22°22’59.64”S | 47°25’49.50”W | Tietê River |
| 5 | 1744 | *H.* aff. *ancistroides* | São Miguel Arcanjo | 23°54’44.58”S | 47°57’40.50”W | Paranapanema River |
| 13 | 1801 | *H.* aff. *ancistroides* | Colina | 20°68’48.20”S | 48°53’14.20”W | Grande River |
| 16 | 1901 | *H. ancistroides* | Araras | 22°22’59.64”S | 47°55’46.75”W | Tietê River |
| 17 | 1903 | *H. ancistroides* | Botucatu | 22°52’29.15”S | 48°22’27.50”W | Tietê River |
| 19 | 1908 | *H. ancistroides* | Botucatu | 22°52’29.15”S | 48°22’27.50”W | Tietê River |
| 20 | 1912 | *H. ancistroides* | Conchas | 23°00’03.00”S | 48°00’00.00”W | Tietê River |
| 21 | 1914 | *H. ancistroides* | Conchas | 23°00’03.00”S | 48°00’00.00”W | Tietê River |
| 22 | 1918 | *H. ancistroides* | Indaiatuba | 23°05’39.12”S | 47°15’38.16”W | Tietê River |
| 23 | 1922 | *H. ancistroides* | Indaiatuba | 23°05’39.12”S | 47°15’38.16”W | Tietê River |
| 25 | 1926 | *H. ancistroides* | Conchas | 23°00’03.00”S | 48°00’00.00”W | Tietê River |
| 27 | 1930 | *H. ancistroides* | Terra Roxa | 20°43’34.00”S | 48°19’15.80”W | Grande River |
| 28 | 1932 | *H. ancistroides* | Terra Roxa | 20°43’34.00”S | 48°19’15.80”W | Grande River |
| 35 | 2587 | *H. faveolus* | Meia Ponte River | 17°44’13.15”S | 49°25’52.24”W | Paranaíba River |
| 40 | 2593 | *H. ancistroides* | Meia Ponte River | 17°44’13.15”S | 49°25’52.24”W | Paranaíba River |
| 41 | 2646 | *H. ancistroides* | Uberabinha River | 18°40’40.37”S | 48°30’23.44”W | Paranaíba River |
